# Supplementary material for: Microbiota in Breast Milk of Chinese Lactating Mothers
Source: PubMed Central journal article supplement (PMC4987007; doi:10.1371/journal.pone.0160856), 2016-08-16

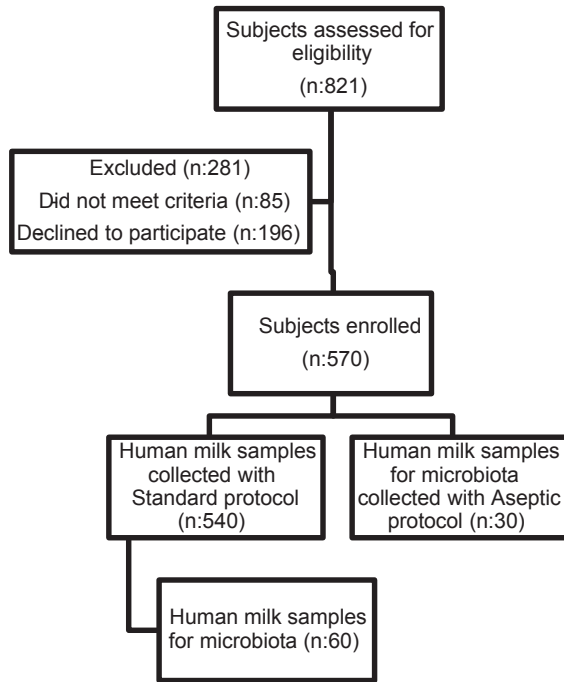

Supplement: pone.0160856.s001.pdf [file pone.0160856.s001.pdf]
